# Supplementary material for: PExM: polyplex expansion microscopy for cell trafficking studies
Source: Royal Society of Chemistry journal article supplement (doi:10.1039/d4nr00917g), 2024-01-01
Supplement: d4nr00917g1.pdf [file d4nr00917g1.pdf]

# PExM: Polyplex Expansion Microscopy for cell trafficking studies

Maria Navalón-López<sup>1</sup>, Pau Castells-Colldeforns<sup>1</sup>, Silvia Pujals<sup>\*2</sup>, Cristina Fornaguera<sup>\*1</sup>, Salvador Borrós<sup>1</sup>

## Supplementary information

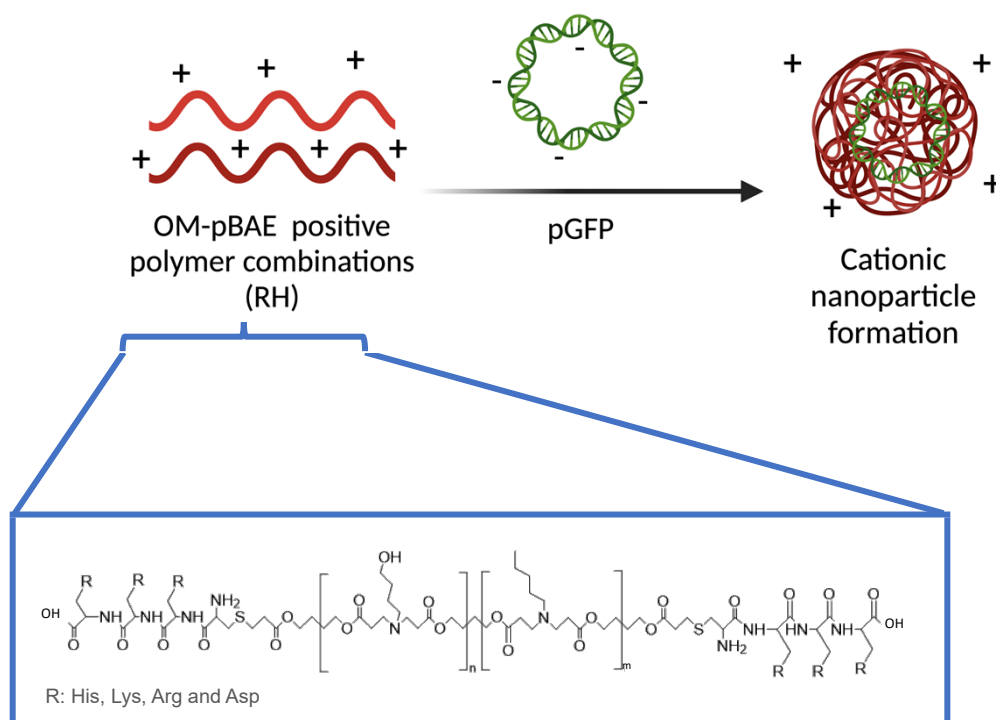

**Figure S1. Poly( $\beta$ -amino esters) nanoparticles components and their chemical structure.**

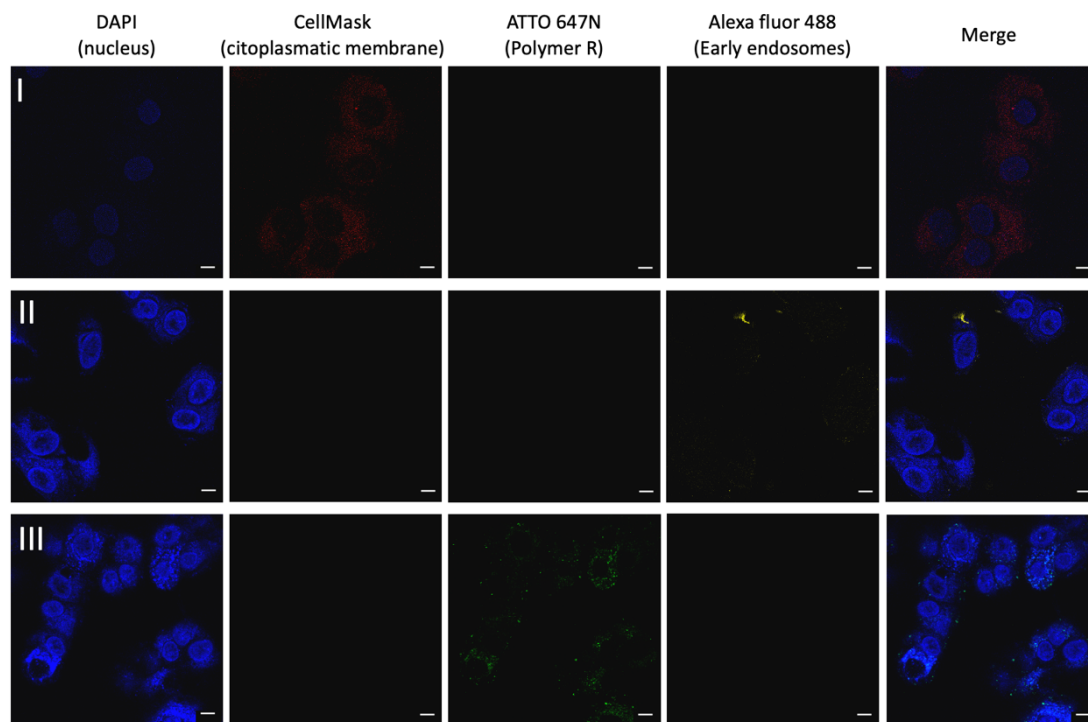

**Figure S2. Fluorophore controls for PExM.** A549 cells were transfected, using R constructs, after 2 hours of expansion. Images taken by a 40X confocal microscope objective. Scale bar: 20  $\mu$ m. I) Cell mask control. II) Alexa fluor 488 control. III) Atto647N control. DAPI channel is shown in blue, CellMask in red, Atto647N in green, Alexa fluor 488 in yellow and the last channel merge the previous channels. Scale bar 20 $\mu$ m and 40X objective.

**Table S1. Labels used for the PNExM protocol, their labelling target, incubations and concentrations.**

| <b>Label</b>    | <b>Attached organelle/molecule</b> | <b>Concentration (ug/mL)</b> | <b>Incubation time (h)</b> | <b>Ex/Em maxima (nm)</b> |
|-----------------|------------------------------------|------------------------------|----------------------------|--------------------------|
| DAPI            | Nuclei                             | 5                            | 0,3                        | 358/461                  |
| Rab5            | Early endosomes                    | 5                            | 1                          | -                        |
| AF488           | Secondary Ab from Rab 5            | 5                            | 0,5                        | 488/525                  |
| CellMask Orange | Plasmatic membrane                 | 20                           | 0,3                        | 554/567                  |
| Atto 647N       | Polymeric Nanoparticles            | 150                          | 12                         | 647/663                  |

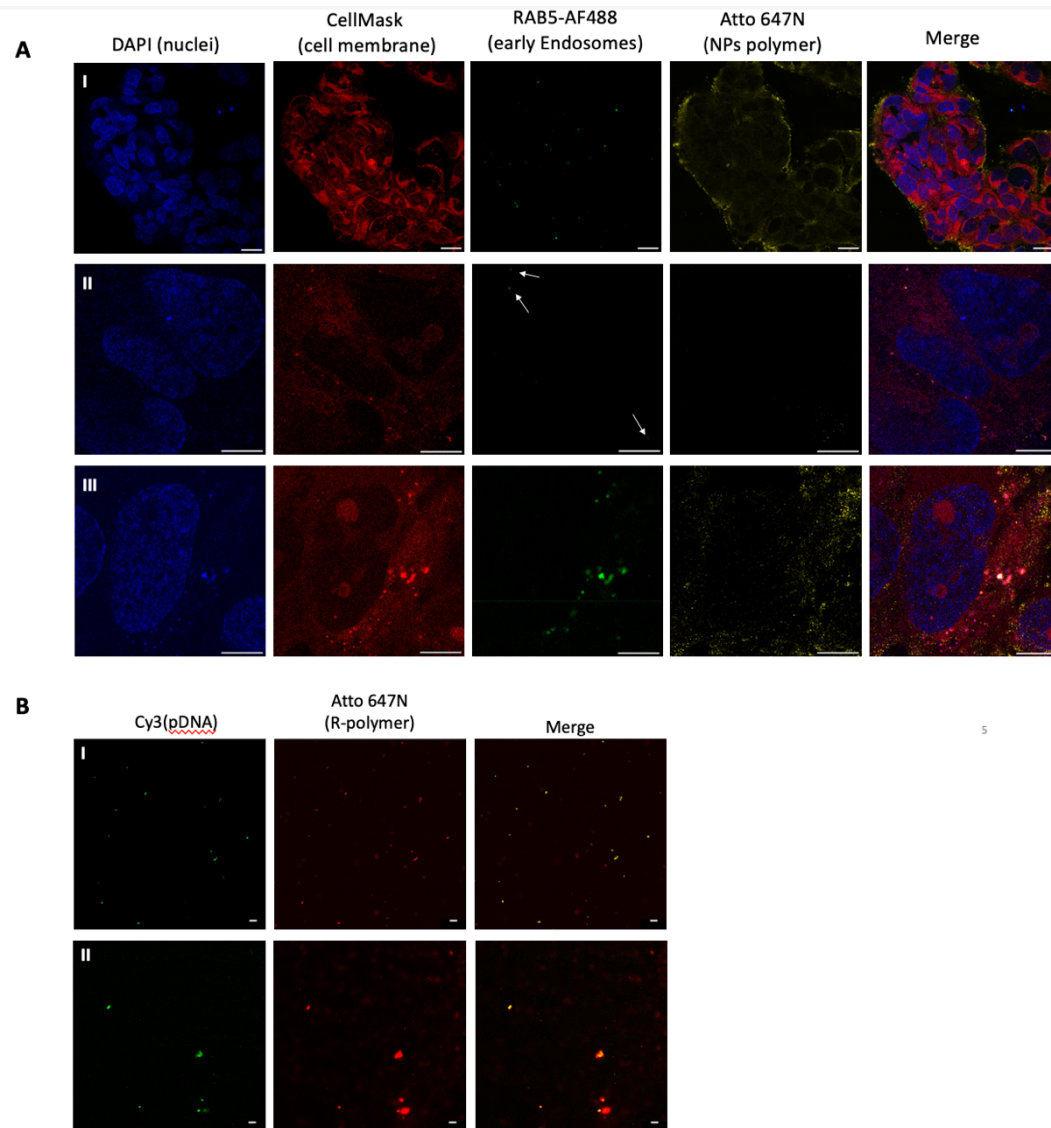

**Figure S3. PExM improvements.** A) BEAS-2B cells transfected with pBAE NPs I) Illustrates normal confocal microscopy (no expansion) in where there is no single particle visualization, scale bar of 20 $\mu$ m, 63x objective. In A II) Protein ExM conventional protocol in where it is difficult to visualize the nanoparticles (signalized with a white arrow) and there is no expansion of them at all. A III) we can see an image of our protocol in where the particles are expanded among with cells allowing single particle visualization. Both II) and III) post-expanded images with scale bar of 92  $\mu$ m B) demonstrates the expansion of the nanoparticles without cells. I) pre-expanded nanoparticles and II) post-expanded particles with a 10 $\mu$ m scale bar.

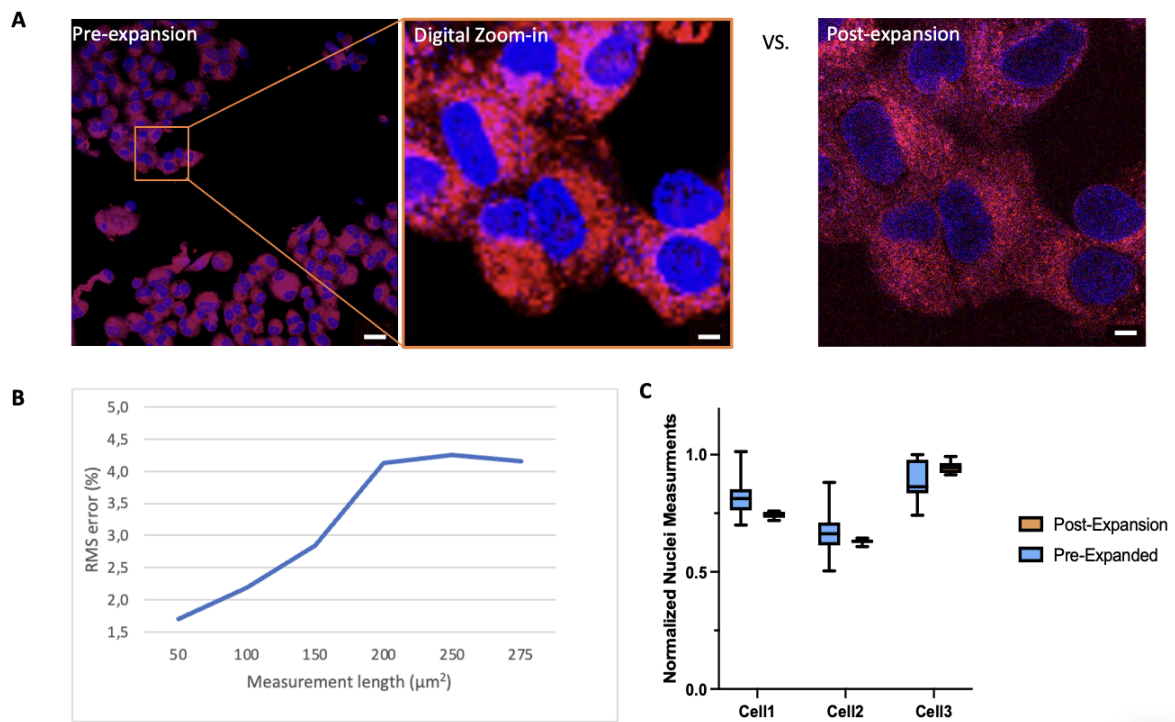

**Figure S4. Representative images used for distortion analysis.** A) pre-expansion image with a digital zoom-in of A549 cells and post-PExM A549 cells using PExM, Scale bar images are  $5\mu\text{m}$  for the pre-expanded image and  $23\mu\text{m}$  for the zoom-in and post-expanded images. B) Root Mean Square error calculated with the images pre and post expansion from Figures A with Matlab RMS image calculator. C) Distortion measurements of 3 different nucleus of different samples. Each nucleus has been measured 10 times with pre-expanded images and post expanded images.

A)

|    | Incubation (h) | Overlapping coefficient (%) | P Value       |
|----|----------------|-----------------------------|---------------|
| RH | 2h             | 34,3 ± 1,5                  | 0,004<br>(**) |
|    | 4h             | 28,6 ± 1,1                  |               |

B)

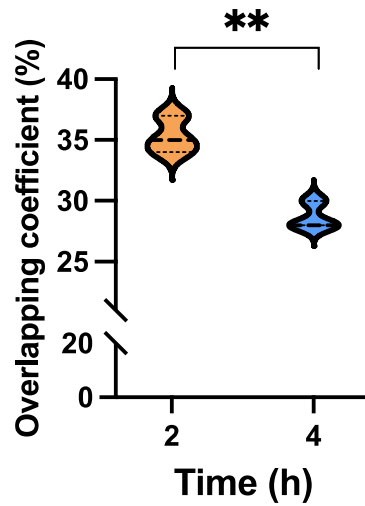

Figure S5. Fiji JACoP Pluggin using overlapping coefficients for the two channels, pBAE nanoparticles and RAB5-AF488 early endosomes for A549 cells transfected with RH NPs. *P* value < 0.0001 (\*\*\*\*), *p* value < 0.001 (\*\*\*) , *p* value < 0.01(\*\*) and *p* value < 0.05 (\*). A) Table; B) Violins plot
